# Supplementary material for: Bioimpedance in children and adolescents between 5 and 18 years of age and its association with overweight and obesity
Source: Research Square preprint supplement (doi:10.21203/rs.3.rs-7143279/v1), 2025-08-05
Supplement: Supplementary file 1 [file 2b817fba2a762ae2ac4503d1.xlsx]

## Sheet: Descr
	[ALL] N=2954	female N=1419	male N=1535	p.overall
Mean age, years	12.5 (3.30)	12.6 (3.37)	12.4 (3.24)	0.063
Sexual maturity rating (SMR) in Tanner stages, nummeric	2.83 (1.63)	3.29 (1.60)	2.27 (1.49)	<0.001
Sexual maturity rating (SMR) in Tanner stages				<0.001
T I: prepubescent	818 (33.9%)	308 (23.1%)	510 (47.1%)
T II: early puberty	369 (15.3%)	162 (12.2%)	207 (19.1%)
T III: midpuberty	273 (11.3%)	185 (13.9%)	88 (8.13%)
T IV: advanced puberty	316 (13.1%)	192 (14.4%)	124 (11.4%)
T V: postpuberty	639 (26.5%)	485 (36.4%)	154 (14.2%)
Mean height, cm	155 (17.8)	154 (16.0)	157 (19.1)	<0.001
Mean BMI, kg/m2	20.8 (5.53)	21.1 (5.84)	20.6 (5.23)	0.013
Mean BMI-SDS	0.43 (1.30)	0.47 (1.34)	0.39 (1.26)	0.115
Weight groups defined by BMI-SDS				0.006
Extreme underweight	67 (2.27%)	30 (2.11%)	37 (2.41%)
Underweight	144 (4.87%)	71 (5.00%)	73 (4.76%)
Normal weight	1978 (67.0%)	950 (66.9%)	1028 (67.0%)
Overweight	246 (8.33%)	111 (7.82%)	135 (8.79%)
Obese	333 (11.3%)	144 (10.1%)	189 (12.3%)
Severely obese	186 (6.30%)	113 (7.96%)	73 (4.76%)
Fat-free mass according to BIA, kg	39.8 (13.3)	37.2 (10.6)	42.1 (14.9)	<0.001
Fat mass according to BIA, kg	12.4 (10.6)	14.4 (11.6)	10.7 (9.19)	<0.001
Fat mass according to BIA, %	21.3 (10.9)	24.7 (10.9)	18.2 (9.98)	<0.001
Total body water according to BIA, l	28.0 (9.56)	26.0 (7.30)	29.9 (10.9)	<0.001
Mean skin fold thickness of the subscapular fold, mm	12.3 (9.10)	12.6 (8.71)	12.0 (9.42)	0.061
Mean skin fold thickness of the triceps fold, mm	15.1 (7.87)	16.5 (7.40)	13.9 (8.09)	<0.001
Fat mass according to Slaughter, %	23.8 (12.0)	23.9 (9.38)	23.6 (14.5)	0.547
